# Supplementary material for: Cobalt-doped MoS2 enhances the evolution of hydrogen by piezo-electric catalysis under the 850 nm near-infrared light irradiation
Source: Royal Society of Chemistry journal article supplement (doi:10.1039/d0nj01053g), 2020-01-01
Supplement: d0nj01053g1.pdf [file d0nj01053g1.pdf]

## Supplementary Materials

### **Cobalt-doped MoS<sub>2</sub> enhances the evolution of hydrogen by piezo-electric catalysis under 850 nm near-infrared light irradiation**

Shou-Qing Liu\*, Kuang-Zheng Huang, Wen-Xiao Liu, Ze-Da Meng, Li Luo,

Jiangsu Key Laboratory of Environmental Functional Materials, School of Chemistry, Biology and Material Engineering, Suzhou University of Science and Technology, Suzhou 215009, China

\* Corresponding authors, Prof. Dr. Shou-Qing Liu; Email address: [shouqing\\_liu@163.com](mailto:shouqing_liu@163.com) (S.Q.Liu); Tel:+86-512-68417050; Fax:+86-512-68415070

#### **Measurements of piezo-currents**

Piezo-currents of the Co-doped MoS<sub>2</sub> were also measured with a CHI660C electrochemistry workstation as follows. First, a 10 mm × 18 mm ITO glass was used as the bottom electrode, on which about 20 mg of the Co-doped MoS<sub>2</sub> was uniformly distributed on a square of 10 × 10 mm<sup>2</sup>, and then another ITO glass was used as the top electrode to fabricate a sandwich piezo-measurement cell (Fig. S1 and 2, the measurement method is reliable and believable, see Fig.S3). A swallow clincher (15 mm × 6.5 mm) was used to clamp the sandwich piezo-measurement cell to maintain its stability, and another swallow clincher was used to bring pressure on or relax the piezo-measurement cell by closing or opening it, respectively. Each of the swallow clincher exerted about 1.2 ± 0.1 kg force on the measurement cell (that is, 1.2 ± 0.1 kg force was exerted on a 10 mm × 10 mm sample when the swallow clincher was closed).

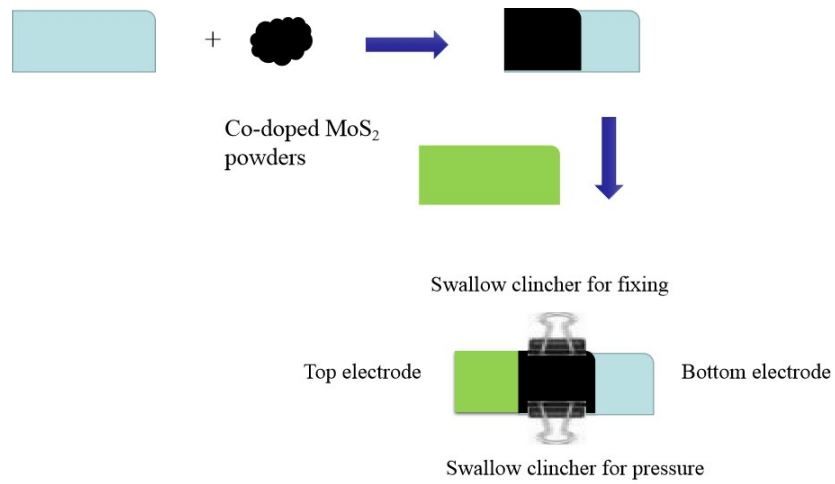

**Fig.S1.** Piezo-measurement cell

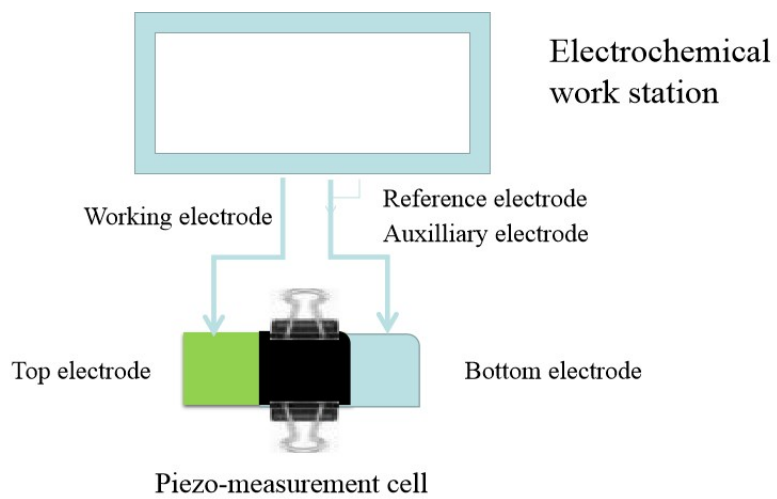

**Fig.S2.** Scheme of measurement of piezo-currents

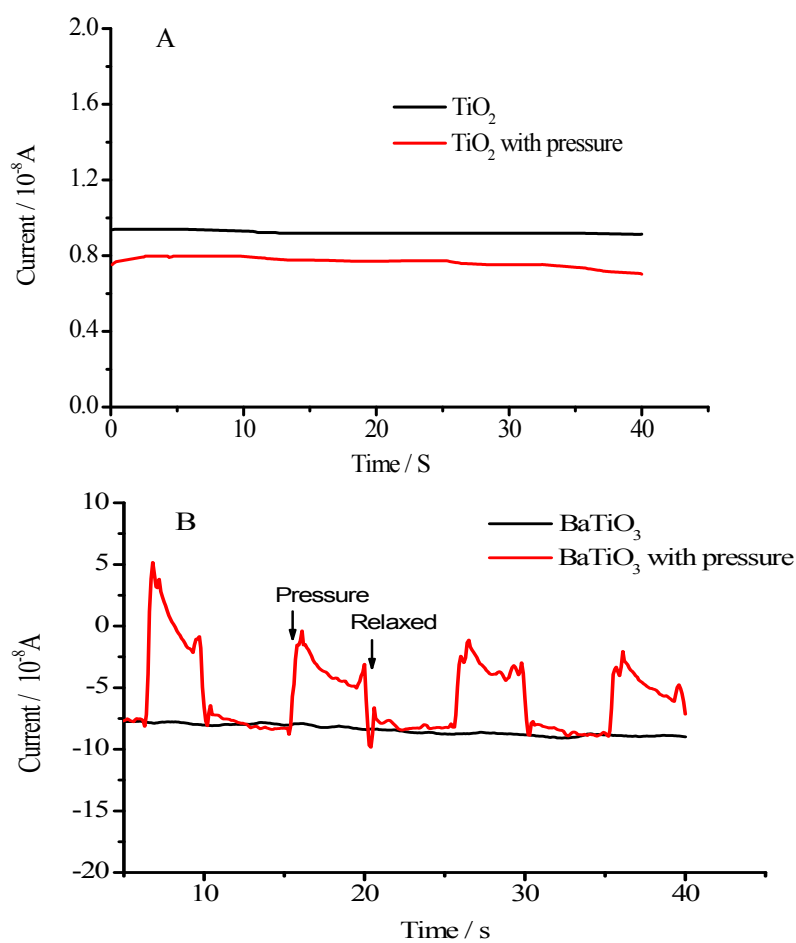

**Fig.S3.** Comparison of piezo-currents of  $\text{TiO}_2$  (A) and  $\text{BaTiO}_3$  (B).

$\text{TiO}_2$  is a non-piezoelectrical material, thus, no piezo-current was observed with pressure. However, the piezo-current of  $\text{BaTiO}_3$ , a piezoelectrical material, was observed with pressure. This demonstrates the measurement method is reliable and believable.
